# Supplementary material for: Ability of the 4-D-Var analysis of the GOSAT BESD XCO 2 retrievals to characterize atmospheric CO 2 at large and synoptic scales
Source: Copernicus journal article supplement (doi:10.5194/acp-16-1653-2016), 2016-02-12
Supplement: Supplementary file [file acp-16-1653-2016-supplement.pdf]

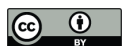

*Supplement of*

## **Ability of the 4-D-Var analysis of the GOSAT BESD XCO<sub>2</sub> retrievals to characterize atmospheric CO<sub>2</sub> at large and synoptic scales**

**S. Massart et al.**

*Correspondence to:* Sébastien Massart (sebastien.massart@ecmwf.int)

The copyright of individual parts of the supplement might differ from the CC-BY 3.0 licence.

Table 1: Coefficient for the fitting of the free run bias against the data of each TCCON station. See appendix A for more details.  $a$  is in ppm per year,  $b$ ,  $\alpha$  and  $\beta$  are in ppm and  $\varphi$  in fraction of  $\pi$ . RMSE is the root mean square error of the difference between the raw bias and the smoothed bias.  $r$  is the correlation coefficient between the raw bias and the smoothed bias. Stations in italic are not used for the fitting.

| Station         | a             | b             | $\alpha$      | $\beta$       | $\varphi$    | RMSE         | r            |
|-----------------|---------------|---------------|---------------|---------------|--------------|--------------|--------------|
| Sodankylä       | 1.573         | -2.721        | 0.000         | 1.630         | 1.688        | 0.470        | 0.930        |
| Białystok       | -0.919        | -1.580        | 1.716         | -1.047        | 0.735        | 0.926        | 0.841        |
| Bremen          | -1.290        | -1.225        | 1.341         | -1.542        | 0.756        | 0.793        | 0.878        |
| Karlsruhe       | -0.144        | -1.171        | 1.241         | -1.184        | 0.831        | 0.620        | 0.891        |
| Orléans         | 0.148         | -1.490        | 1.527         | -0.912        | 0.859        | 0.476        | 0.880        |
| Garmisch        | 2.837         | -2.311        | 0.463         | -0.986        | 0.801        | 0.817        | 0.785        |
| Park Falls      | -0.338        | -1.372        | 0.912         | -1.398        | 0.863        | 0.660        | 0.880        |
| Four Corners    | 0.651         | 0.601         | 0.000         | -1.365        | 1.151        | 0.493        | 0.866        |
| Lamont          | -1.405        | 0.254         | 1.600         | -0.906        | 1.074        | 0.912        | 0.783        |
| <i>Tsukuba</i>  | <i>-1.401</i> | <i>1.947</i>  | <i>0.584</i>  | <i>-0.939</i> | <i>1.002</i> | <i>0.649</i> | <i>0.781</i> |
| <i>Edwards</i>  | <i>-6.699</i> | <i>6.888</i>  | <i>-1.024</i> | <i>-0.319</i> | <i>0.895</i> | <i>0.644</i> | <i>0.894</i> |
| <i>Pasadena</i> | <i>-1.600</i> | <i>3.411</i>  | <i>1.783</i>  | <i>-0.080</i> | <i>1.231</i> | <i>1.032</i> | <i>0.722</i> |
| <i>JPL</i>      | <i>14.786</i> | <i>-0.281</i> | <i>2.565</i>  | <i>-0.491</i> | <i>0.618</i> | <i>1.067</i> | <i>0.363</i> |
| Saga            | -0.560        | -1.052        | 1.154         | -1.058        | 0.975        | 0.638        | 0.861        |
| Izaña           | -0.510        | 0.553         | 0.281         | -0.463        | 0.678        | 0.450        | 0.654        |
| Ascension       | 1.684         | 1.269         | 0.000         | -0.610        | 0.623        | 0.508        | 0.727        |
| Darwin          | 0.258         | 1.485         | 1.048         | 0.361         | 1.022        | 0.534        | 0.846        |
| Réunion         | -1.546        | 1.295         | 1.219         | 0.583         | 1.002        | 0.290        | 0.898        |
| Wollongong      | 0.895         | -0.245        | 0.780         | 0.081         | 1.160        | 0.390        | 0.888        |
| Lauder          | 2.081         | -0.888        | -0.289        | -0.129        | 0.675        | 0.273        | 0.897        |

Table 2: Same as tab. 1 but for the analysis.

| Station          | a             | b            | $\alpha$      | $\beta$       | $\varphi$    | RMSE         | r            |
|------------------|---------------|--------------|---------------|---------------|--------------|--------------|--------------|
| Sodankylä        | 3.393         | -2.345       | 0.000         | -1.094        | 0.850        | 0.535        | 0.888        |
| Białystok        | 0.038         | -1.286       | 1.107         | -1.043        | 0.842        | 0.935        | 0.768        |
| Bremen           | 0.858         | -1.396       | 0.563         | -1.431        | 0.821        | 0.694        | 0.850        |
| Karlsruhe        | 1.349         | -1.264       | 0.693         | -1.243        | 0.890        | 0.576        | 0.889        |
| Orléans          | 1.008         | -1.380       | 1.269         | -0.930        | 0.954        | 0.364        | 0.920        |
| Garmisch         | 3.966         | -2.379       | 0.037         | -1.080        | 0.822        | 0.821        | 0.789        |
| Park Falls       | 1.672         | -1.512       | 0.059         | -1.172        | 0.908        | 0.457        | 0.876        |
| Four Corners     | -0.968        | 1.075        | 0.000         | -0.294        | 1.000        | 0.352        | 0.501        |
| Lamont           | -1.257        | 0.559        | 0.860         | 0.098         | 1.081        | 0.668        | 0.512        |
| <i>Tsukuba</i>   | <i>-1.821</i> | <i>2.857</i> | <i>0.250</i>  | <i>-0.368</i> | <i>1.136</i> | <i>0.860</i> | <i>0.497</i> |
| <i>Edwards</i>   | <i>-7.394</i> | <i>6.754</i> | <i>-0.448</i> | <i>-0.033</i> | <i>1.206</i> | <i>0.499</i> | <i>0.852</i> |
| <i>Pasadena</i>  | <i>-0.951</i> | <i>3.446</i> | <i>1.370</i>  | <i>0.314</i>  | <i>1.330</i> | <i>0.932</i> | <i>0.705</i> |
| <i>JPL</i>       | <i>11.119</i> | <i>0.973</i> | <i>1.322</i>  | <i>-0.279</i> | <i>0.608</i> | <i>1.083</i> | <i>0.500</i> |
| Saga             | 1.516         | -1.673       | -0.065        | -1.115        | 0.785        | 0.752        | 0.669        |
| Izaña            | 0.081         | 0.372        | 0.092         | -0.431        | 0.693        | 0.336        | 0.665        |
| Ascension Island | 0.921         | 0.197        | 0.000         | -0.617        | 0.702        | 0.549        | 0.644        |
| Darwin           | -1.481        | 0.846        | 1.340         | 0.334         | 0.977        | 0.415        | 0.849        |
| Réunion Island   | -2.226        | 0.421        | 1.019         | 0.370         | 0.965        | 0.271        | 0.781        |
| Wollongong       | -0.028        | -1.084       | 0.447         | 0.424         | 0.914        | 0.468        | 0.674        |
| Lauder           | 0.472         | -1.220       | -0.151        | 0.118         | 1.312        | 0.254        | 0.545        |

Table 3: Same as tab. 1 but for the standard deviation.

| Station         | a             | b            | $\alpha$      | $\beta$       | $\varphi$    | RMSE         | r            |
|-----------------|---------------|--------------|---------------|---------------|--------------|--------------|--------------|
| Sodankylä       | -0.025        | 0.690        | 0.000         | 0.289         | 0.614        | 0.186        | 0.737        |
| Białystok       | 0.355         | 0.494        | 0.457         | -0.001        | 1.613        | 0.398        | 0.628        |
| Bremen          | 0.789         | 0.126        | -0.145        | -0.291        | 1.212        | 0.212        | 0.600        |
| Karlsruhe       | 0.201         | 0.525        | -0.260        | -0.079        | 0.551        | 0.278        | 0.528        |
| Orléans         | -0.108        | 0.570        | 0.197         | 0.093         | 1.327        | 0.213        | 0.581        |
| Garmisch        | 0.123         | 0.535        | -0.202        | 0.120         | 0.479        | 0.320        | 0.482        |
| Park Falls      | -0.101        | 0.826        | 0.622         | -0.265        | 1.424        | 0.395        | 0.774        |
| Four Corners    | 1.042         | 0.945        | 0.000         | 0.745         | 0.532        | 0.408        | 0.762        |
| Lamont          | -0.224        | 0.974        | 0.628         | -0.137        | 1.463        | 0.321        | 0.819        |
| <i>Tsukuba</i>  | <i>-0.145</i> | <i>0.840</i> | <i>-0.149</i> | <i>0.064</i>  | <i>0.573</i> | <i>0.256</i> | <i>0.442</i> |
| <i>Edwards</i>  | <i>0.239</i>  | <i>0.158</i> | <i>0.530</i>  | <i>-0.158</i> | <i>1.035</i> | <i>0.243</i> | <i>0.619</i> |
| <i>Pasadena</i> | <i>0.115</i>  | <i>1.393</i> | <i>-0.024</i> | <i>0.373</i>  | <i>1.153</i> | <i>0.458</i> | <i>0.514</i> |
| <i>JPL</i>      | <i>4.183</i>  | <i>0.160</i> | <i>-0.633</i> | <i>0.031</i>  | <i>1.256</i> | <i>0.314</i> | <i>0.646</i> |
| Saga            | -0.129        | 0.504        | 0.131         | 0.012         | 1.075        | 0.230        | 0.298        |
| Izaña           | 0.277         | 0.175        | -0.150        | 0.072         | 0.823        | 0.174        | 0.536        |
| Ascension       | 0.310         | 0.502        | 0.000         | -0.201        | 0.999        | 0.188        | 0.547        |
| Darwin          | -0.055        | 0.573        | 0.158         | 0.083         | 1.062        | 0.175        | 0.544        |
| Réunion         | 0.148         | 0.277        | 0.080         | 0.095         | 1.520        | 0.115        | 0.482        |
| Wollongong      | -0.008        | 0.529        | 0.138         | -0.029        | 0.683        | 0.150        | 0.550        |
| Lauder          | 0.014         | 0.338        | -0.052        | 0.071         | 1.191        | 0.121        | 0.459        |

Table 4: Same as tab. 2 but for the standard deviation.

| Station          | a             | b             | $\alpha$      | $\beta$       | $\varphi$    | RMSE         | r            |
|------------------|---------------|---------------|---------------|---------------|--------------|--------------|--------------|
| Sodankylä        | -0.163        | 0.705         | 0.000         | 0.253         | 0.656        | 0.231        | 0.615        |
| Białystok        | 0.207         | 0.571         | 0.412         | 0.074         | 1.537        | 0.382        | 0.624        |
| Bremen           | 0.491         | 0.269         | -0.070        | -0.172        | 1.270        | 0.180        | 0.508        |
| Karlsruhe        | 0.106         | 0.522         | 0.167         | 0.110         | 1.440        | 0.239        | 0.470        |
| Orléans          | -0.187        | 0.522         | 0.136         | 0.092         | 1.271        | 0.144        | 0.564        |
| Garmisch         | 0.147         | 0.526         | -0.229        | 0.118         | 0.536        | 0.353        | 0.468        |
| Park Falls       | -0.101        | 0.679         | 0.305         | -0.030        | 1.415        | 0.268        | 0.605        |
| Four Corners     | 0.969         | 1.014         | 0.000         | 0.643         | 0.482        | 0.426        | 0.696        |
| Lamont           | -0.014        | 0.845         | 0.385         | -0.030        | 1.530        | 0.247        | 0.746        |
| <i>Tsukuba</i>   | <i>-0.261</i> | <i>0.913</i>  | <i>-0.192</i> | <i>0.005</i>  | <i>0.631</i> | <i>0.321</i> | <i>0.467</i> |
| <i>Edwards</i>   | <i>0.698</i>  | <i>-0.122</i> | <i>0.590</i>  | <i>-0.086</i> | <i>1.134</i> | <i>0.206</i> | <i>0.690</i> |
| <i>Pasadena</i>  | <i>-0.159</i> | <i>1.709</i>  | <i>0.095</i>  | <i>0.427</i>  | <i>1.188</i> | <i>0.584</i> | <i>0.447</i> |
| <i>JPL</i>       | <i>17.986</i> | <i>-2.350</i> | <i>3.014</i>  | <i>-0.455</i> | <i>0.569</i> | <i>0.520</i> | <i>0.676</i> |
| Saga             | 0.105         | 0.424         | -0.029        | -0.048        | 0.637        | 0.220        | 0.160        |
| Izaña            | 0.144         | 0.191         | -0.068        | 0.062         | 0.728        | 0.127        | 0.474        |
| Ascension Island | 0.154         | 0.579         | 0.000         | -0.231        | 1.074        | 0.185        | 0.503        |
| Darwin           | 0.089         | 0.524         | 0.071         | 0.107         | 1.132        | 0.178        | 0.527        |
| Réunion Island   | 0.041         | 0.325         | 0.072         | 0.063         | 1.526        | 0.114        | 0.432        |
| Wollongong       | 0.067         | 0.648         | 0.015         | 0.052         | 0.679        | 0.231        | 0.204        |
| Lauder           | 0.263         | 0.225         | -0.121        | 0.033         | 1.228        | 0.138        | 0.508        |

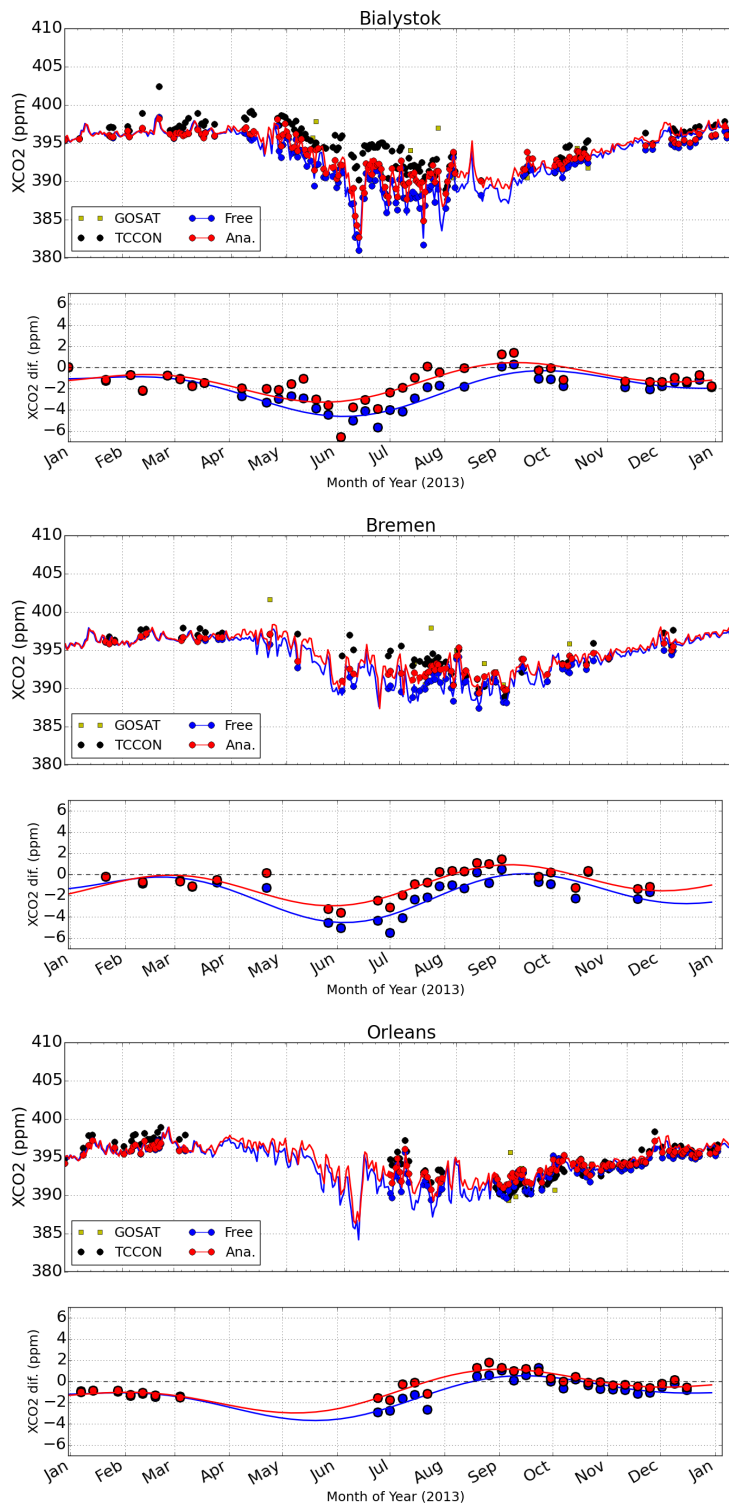

Figure 1: Same as Fig. 4 of the article for Białystok, Bremen and Orléans (from top to bottom).

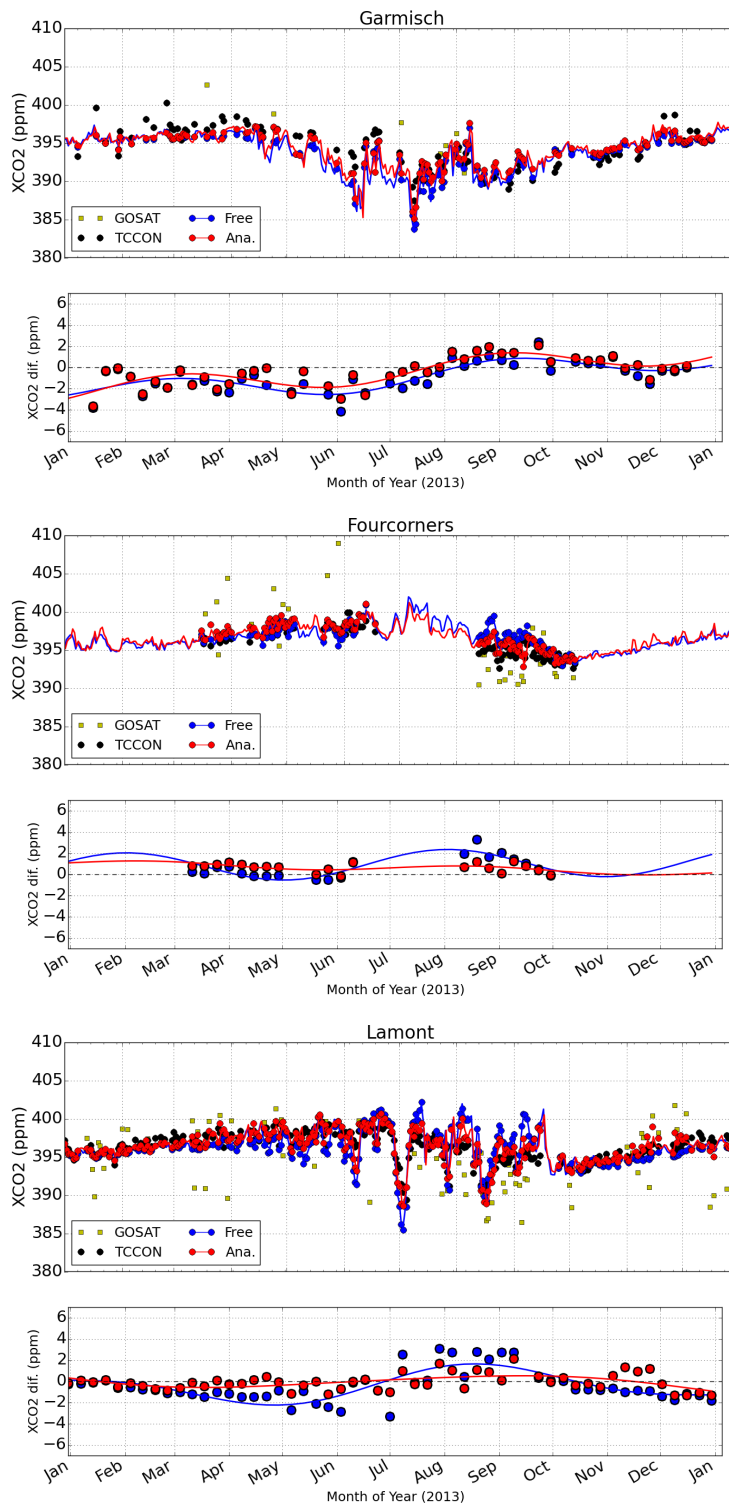

Figure 2: Same as Fig. 4 of the article for Garmisch, Four Corners and Lamont (from top to bottom).

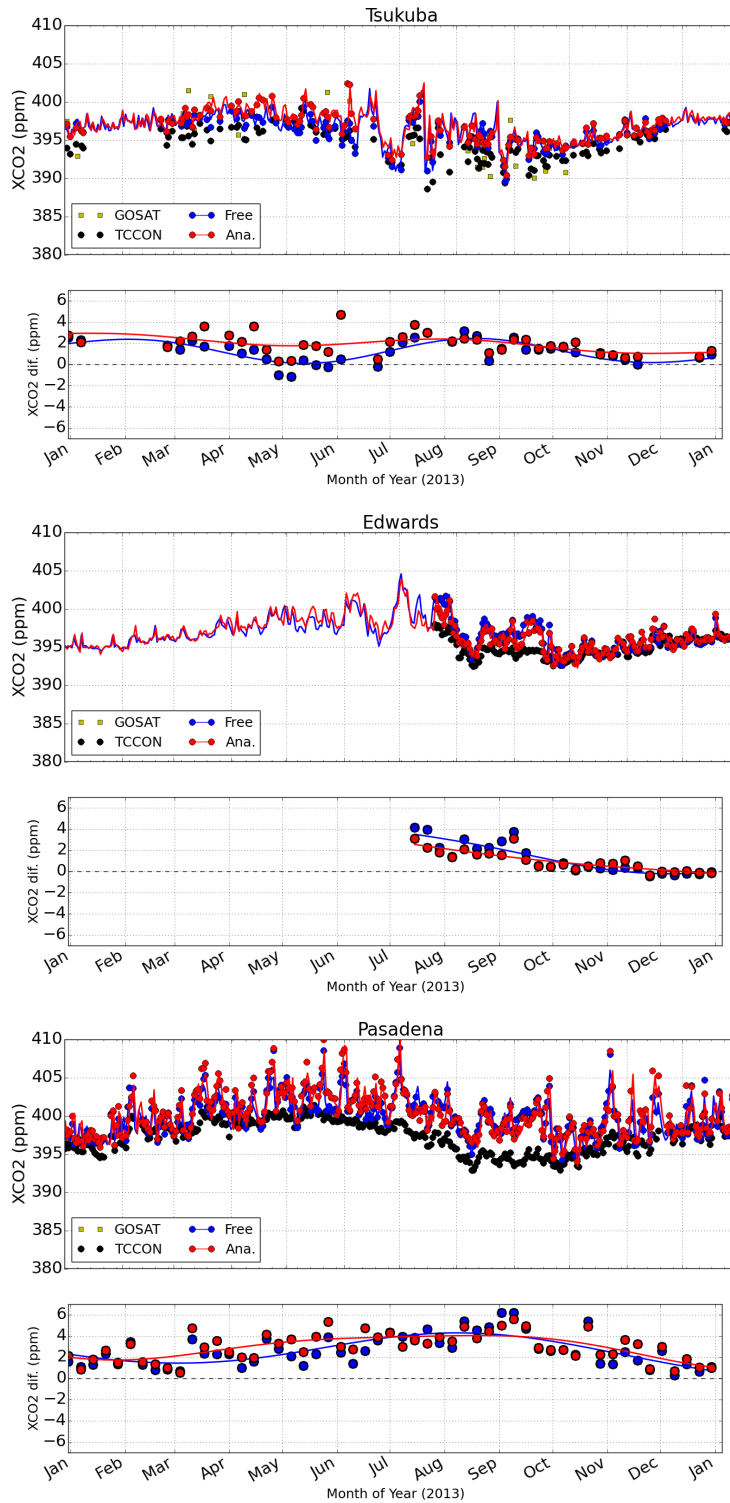

Figure 3: Same as Fig. 4 of the article for Tsukuba, Edwards and Pasadena.



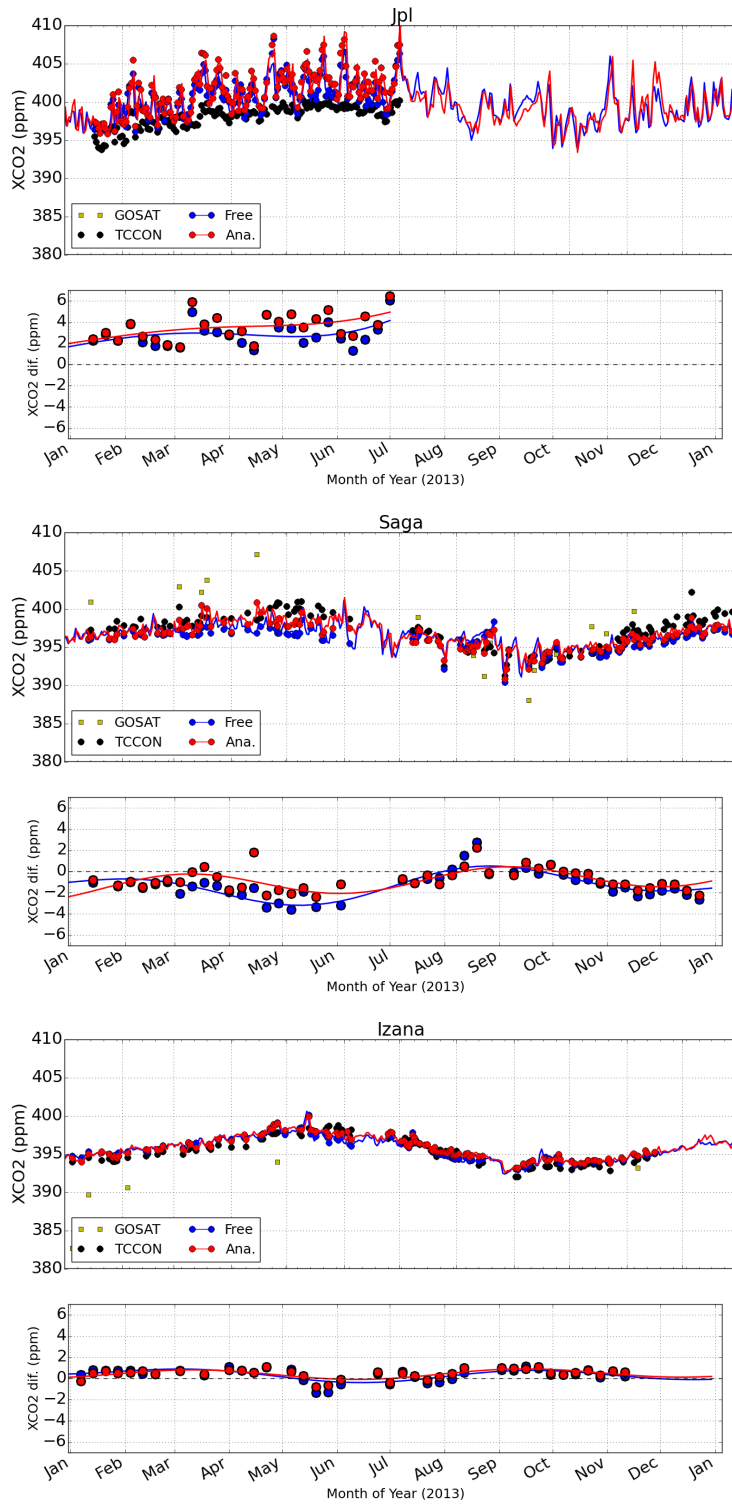

Figure 4: Same as Fig. 4 of the article for Jpl, Saga and Izaña.

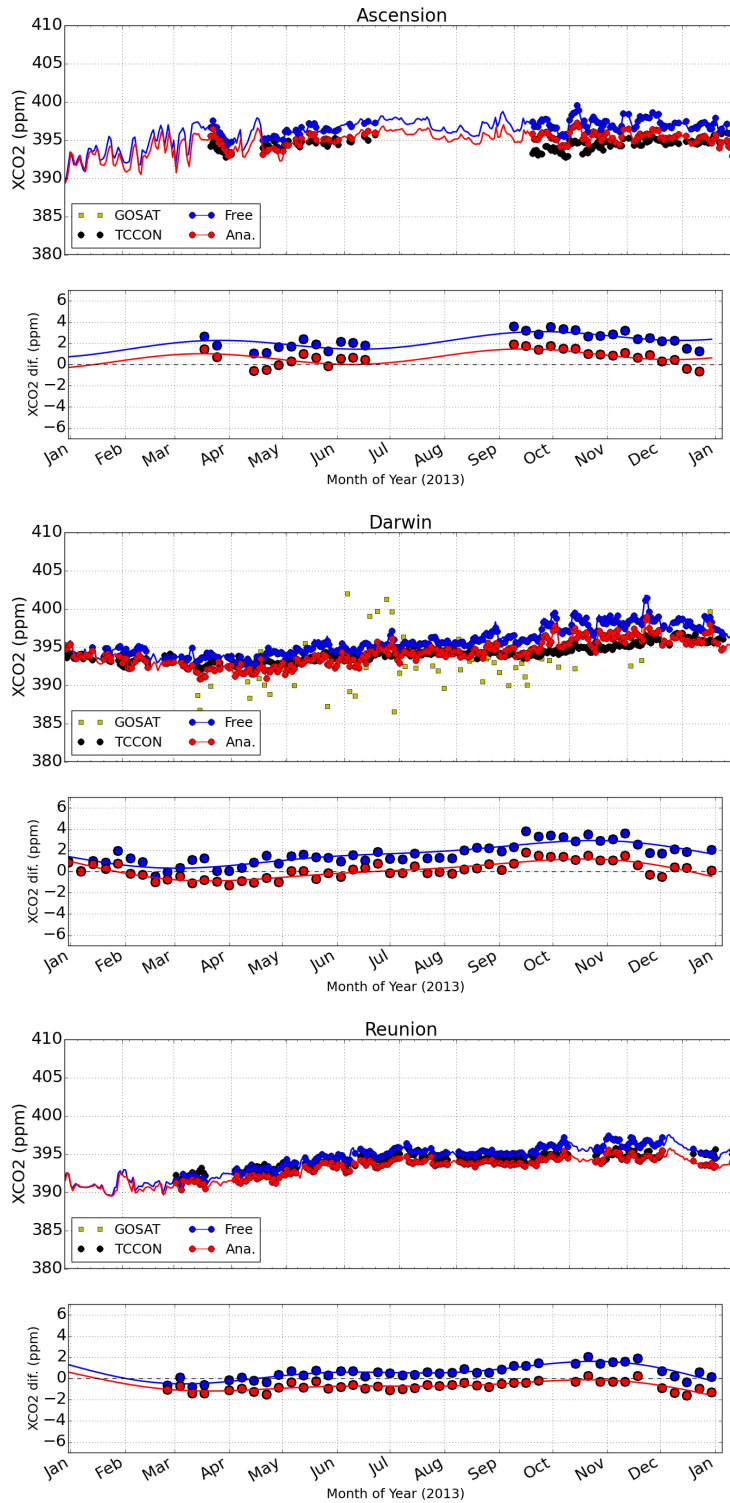

Figure 5: Same as Fig. 4 of the article for Ascension Island, Darwin and Réunion Island.

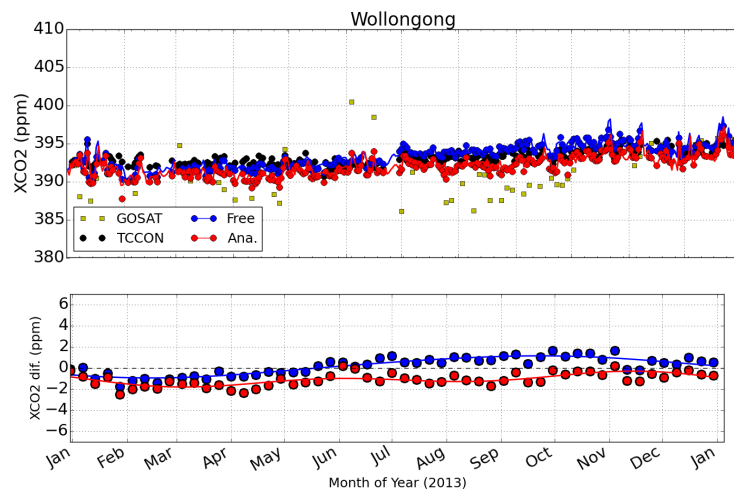

Figure 6: Same as Fig. 4 of the article for Wollongong.
